# Supplementary material for: DFT insights into the adsorption of NH3-SCR related small gases in Mn-MOF-74
Source: Royal Society of Chemistry journal article supplement (doi:10.1039/c6cp05557e), 2016-01-01
Supplement: c6cp05557e1.pdf [file c6cp05557e1.pdf]

## Supporting Information

### DFT Insights into the Adsorption of NH<sub>3</sub>-SCR Related Small Gases in

### Mn-MOF-74

Minhua Zhang<sup>a,b</sup>, Xuwei Huang<sup>a,b</sup>, Yifei Chen<sup>a,b\*</sup>

<sup>a</sup> Key Laboratory for Green Chemical Technology of Ministry of Education, R&D Center for Petrochemical Technology, Tianjin University, Tianjin 300072, China

<sup>b</sup> Collaborative Innovation Center of Chemical Science and Engineering, Tianjin 300072, China

\*Corresponding author. Tel.: +86-22-27406119; fax: +86-22-27406119. E-mail address: yfchen@tju.edu.cn.

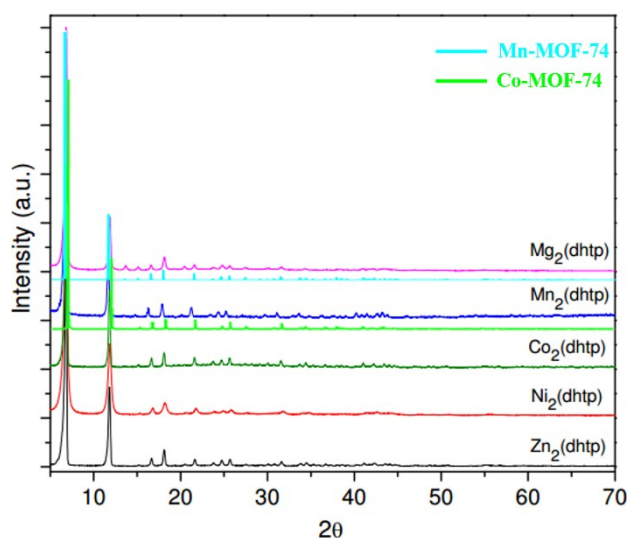

Fig. S1 Comparison between experimental and calculated PXRD patterns of Mn-MOF-74 and Co-MOF-74

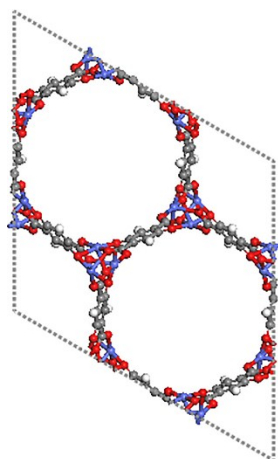

Fig. S2 DFT optimized Co-MOF-74 structure

Table S1. Comparison of lattice parameters of Co-MOF-74 between experimental results and DFT optimization

| Co-MOF-74<br>lattice<br>constant (Å) | Experimental data <sup>1</sup> | Experimental data <sup>2</sup> | Our Calculated<br>data |
|--------------------------------------|--------------------------------|--------------------------------|------------------------|
| a                                    | 26.132                         | 25.948                         | 25.877                 |
| b                                    | 26.132                         | 25.948                         | 25.877                 |
| c                                    | 6.722                          | 6.838                          | 6.866                  |

#### References

- [1] Ng. W. Wong, J. A. Kaduk and H. Wu, Synchrotron X-ray studies of metal-organic framework M2 (2, 5-dihydroxyterephthalate), M=(Mn, Co, Ni, Zn)(MOF-74), *Powder Diffr.*, 2012, **27**, 256-262.
- [2] W. Zhou, H. Wu and T. Yildirim, Enhanced H<sub>2</sub> adsorption in isostructural metal-organic frameworks with open metal sites: strong dependence of the binding strength on metal ions, *J. Am. Chem. Soc.*, 2008, **130**(130), 15268-15269.

Table S2. Optimized geometries of adsorbed NH<sub>3</sub>-SCR related small gases in Mn-MOF-74

| Molecule                        | Bond name | Bond length(Å) |
|---------------------------------|-----------|----------------|
| NH <sub>3</sub>                 | Mn-N      | 2.059          |
|                                 | N-H1*     | 1.032          |
|                                 | N-H2*     | 1.028          |
|                                 | N-H3*     | 1.030          |
| NO                              | Mn-N      | 2.011          |
|                                 | N-O*      | 1.207          |
| O <sub>2</sub>                  | Mn-O      | 2.053          |
|                                 | O-O*      | 1.319          |
| NO <sub>2</sub>                 | Mn-N      | 2.064          |
|                                 | N-O1*     | 1.364          |
|                                 | N-O2*     | 1.374          |
| H <sub>2</sub> O                | Mn-O      | 2.200          |
|                                 | O-H1*     | 0.994          |
|                                 | O-H2*     | 0.995          |
| SO <sub>2(1)</sub> <sup>a</sup> | Mn-O      | 2.014          |
|                                 | S-O1*     | 1.618          |
|                                 | S-O2*     | 1.553          |
| SO <sub>2(2)</sub> <sup>b</sup> | Mn-S      | 2.547          |
|                                 | S-O1*     | 1.559          |
|                                 | S-O2*     | 1.556          |

\* means the intramolecule bond lengths of the adsorbed gas molecules;

<sup>a</sup>SO<sub>2(1)</sub> refers to the configuration when SO<sub>2</sub> adsorbs in the Mn-MOF-74 in the form of O end adsorption, while <sup>a</sup>SO<sub>2(2)</sub> is the case of S end adsorption.
